# Supplementary material for: Association between circulating resistin levels and thyroid dysfunction: A systematic review and meta-analysis
Source: Front Endocrinol (Lausanne). 2023 Jan 4;13:1071922. doi: 10.3389/fendo.2022.1071922 (PMC9845899; doi:10.3389/fendo.2022.1071922)
Supplement: Supplementary file 1 [file Table_1.xlsx]

## Sheet: Sheet1
列1	列15	列152	列1523	列1522	列153	列1532	列154	列155	列16	列165	列1652	列1653	列1654	列166	列1663	列1664	列1662	列167	列168	列169	列1692	列170	列164	列1642	列163	列1633	列1632	列16323	列163232	列16324	列16322	列162	列17	列2	列3	列4	列5	列6	列7	列8	列9	列10	列11	列12	列13	列14	列142
作者			men,/ No. (%)	Women/ No. (%)	WC (cm)		种族（%）		TSH			T4		TT3			FT4			FT3			BMI		age		胰岛素								甲亢			正常组				甲减			Euthyroid				男治疗前
										正常	ZLH治疗后			P	C	ZLH	P	C	ZLH	P	C	ZLH			p	c								mean	SD	Total	mean	SD	Total		mean	SD	Total	mean	SD	Total		mean	SD
Krassas et al. 2006	Resistin (ng/ml)	甲减	6+8	47+22	95.2+15.2	95.1+11.5			67.5±56.9	1.6±1.9	4.1=6.0			0.9=0.5	1.7=1.2	2.2=0.6	7.7=3.9	18.1=5.9	19.3=3.9				30.5±6.4	29.8±5.1	48.2±14.6	50.4±13.5	13.0+10.2	16.9+12.8													7.4	4	53	5.1	3.5	30		6.4	3.7
	胰岛素抵抗指数																																								22.7	1.4	53	29.2	1.5	30
Krassas et al.2005	Resistin (ng/ml)	甲亢	12+10	31+13	83.8^12.6	87.2^9.4			0.005=0.13	1.8=1.9	3.5^6.3			5.8^2.6	1.8^1.1	1.7^0.7	44.7^12.9	18.7^6.9	19.3^7.7				24.4=4.5	25.3=3.9	47.8^13.7	47.8^11.4								11	6.5	43	6.1	3.7	23
	胰岛素抵抗指数
Y aturu et al. 2004	Resistin (ug)	甲亢、甲减	15+5	54+27					0.087 ? 0.05	20.35 ? 4.2							2.72 ? 0.18		0.68 ? 0.06	10.56 ? 0.94		1.49 ? 0.13	2 5 . 7 ? 1.5	27.5 ? 1.0	42.68 ? 1.5	40 ? 2.2
Ozlem Kaplan 2012	Resistin (ng/mL)	甲减手术		30	93.2 ± 14.5	92.4 ± 14.6			64.2 ± 28.4	1.0 ± 0.7							0.44 ± 0.21		1.3 ± 0.2	1.2 ± 0.5		3.2 ± 0.4	29.1 ± 6.1	28.6 ± 5.9	44.0 ± 11.6	44.0 ± 11.6															17.2	7.7	30	18.2	9.9	30
	胰岛素抵抗指数																																								3.2	3.5	30	2.9	2.9	30
Iglesias et al. 2003	Resistin (µg/l)	甲亢	4+3+3	16+17+17					0·05 ± 0·004	1·8 ± 0·3				6·6 ± 0·9	1·8 ± 0·1		45·8 ± 3·1†	14·8 ± 0·6					22·7 ± 0·5†	25·1 ± 0·9	47·2 ± 3·9	43·1 ± 2·6	117·0 ± 9·3	86·2 ± 9·3						6.4	0.8	20	8.4	0.7	20		5.8	1	20	8.4	0.7	20	甲亢	9.6	0.5
	HOMA-R index (mm mU / l)	甲减							62·6 ± 9·0					1·2 ± 0·2			5·6 ± 0·5						28·5 ± 1·0§		51·5 ± 4·1		90·5 ± 13·6							4.5	0.4	20	2.9	0.3	20		3.4	0.5	20	2.9	0.3	20	甲减	6.2	1.2
Sibel Guldiken 2008	Resistin (ng/mL)	甲减	7+2+5	18+28+20	90.1 ? 12.2	87.8 ? 15.9			44.6 ? 25.2	1.3 ? 0.6‡							0.63 ? 0.22	1.32 ? 0.19		2.2 ? 0.8	3.0 ? 0.7		28.6 ? 5.8	28.1 ? 6.8	41.4 ? 8.2	36.8 ? 5.6	11.5 ? 4.4	9.7 ? 8.7													7.3	2.2	25	6.4	2.1	25
	HOMA-IR	亚临床甲减			87.5 ? 11.5				8.5 ? 1.9‡								1.21 ? 0.23			2.3 ? 0.5			27.3 ? 4.8		39.7 ? 10.5		11.7 ? 5.3														2.6	1.2	25	2.4	1.5	25
Goomez-Zamudio 2016	Resistin (ng/mL)	甲减			132.1 ? 14.9	128.2 ? 15.5			4.78 (2.34-7.4)	2.69 (2.05-3.5)							1.22 (1.09e1.5)	1.24 (1.17e1.4)					47.9 ? 7.8	46.2 ? 9.1	44.1 ? 11.6	44.4 ? 12.0	24.3 (15.5e41.3)	19.4 (13.1e28.9)													27.8	(17.9-46.2)	49	23.8	(15.0-30.8)	49
									<=2.35	2.36-4.06	>=4.07																														36.7	30.19	49	23.2	11.71	49
								TSH分度：	1.7 (0.8e2.1)	3.18 (2.9e3.72)	6.02 (4.7e8.9)																														6.43	(3.74-12.8)	49	6.2	(3.8-9.4)	49
								resistin	25.8 (19.7e35.7)	24.9 (13.7e36.4)	24.9 (14.4e41.2)																														10.56	12.92	49	7.1	4.48	49
Koyuncu 2013	Resistin (ng/mL)		17名男性(22%)	61名女性(78%)				甲亢	0.089 ± 0.090훼	2.10 ± 1.26							2.08 ± 1.20	0.83 ± 0.10							43.43 ± 15.66	37 ± 12.53								9.51	5.48	15	8.45	2.9	17		13.6	6.25	15	8.45	2.9	17
								甲减	50.85 ± 75.03								0.53 ± 0.23								47 .84 ± 13.31∗								总甲亢	12.19	7.13	30	8.45	2.9	17		12.66	6.04	31	8.45	2.9	17
																																TSH	FT4	0.05 ± 0.06	3.08 ± 0.88						94.4 ± 89.97	0.33 ± 0.14
Dimitriadis 2006	Resistin (ng/ml)	甲减		11+10					72=10	1=0.08		1.6±0.4uU/dl	9 ? 1 ?U/dl	43±10ng/dl;0.66±0.1nmol/Liter	T3 114 ? 9 ng/dl (1.8 ? 0.1 nmol/liter),								24=1	24=1	45=3	42=4															3.3	0.4	11	2.8	0.2	10
chen 2016		甲亢	对照120+甲减68+甲亢76	（355-120）+（197-68）+（230-76）					0.41±2.22 0.004 (0.000, 16.43)c	2.56±0.87 2.52 (0.51, 4.94)a							33.1±14.74 32.18 (5.21, 84.09	14.44±1.6314.29 (10.00, 19.04)		18.19±10.99 15.97 (1.81, 59.63	3.9±0.76 3.38 (2.63, 6.65		23.76 ± 2.91c	24.55 ± 3.36a	45.85 ± 13.94	47.07 ± 15.15	12.21±4.76 10.15 (5.89, 30.74)	10.14±4.14 9.07 (3.64, 27.90)						18.26	33.77	230	9.11	5.08	355		10.47	7.1	197	9.11	5.08	355
		甲减							10.36±17.33 3.58 (4.98, 103.59) b								7.07±1.05 7.25 (4.28, 9.68)			2.57±0.69 2.57 (1.08, 4.67)			25.72 ± 2.89b		46.50 ± 15.64		10.98±4.76 9.74 (3.95, 29.35)							2.12 (0.94, 9.36)				1.89 (0.89, 10.29)			1.95 (0.93, 9.19)				1.89 (0.89, 10.29)
Aksoy DY 2013	Resistin (ng/mL)	亚临床甲减		36+27	82.8±14.1	89.2±14.7		PC	6.795±1.9675	3.46±1.15							13.2850±2.8025	15.8800±4					25.7±5.2	27.2±4.8	34.9±10.2	33.6±9.8
				治疗前后	81.6±13.3	80.5±11.2																治疗前后	25.8±5.3	25.6±5.3
Akbaba 2015		亚临床甲减	10+11	41+32					6.2 ± 1.3	1.9 ± 0.8						pc	0.8 ± 0.1	1.02 ± 0.2		Zainab Samir Yahya Hammo et al 2019	2019		26.1 ± 5.5	25.7 ± 4.2	36.9 ± 10.6	34.9 ± 8.4
										2.3 ± 0.8						治疗前后		1.2 ± 0.5						25.7 ± 4.2
Zainab Samir Yahya Hammo et al 2019		甲亢	35+35+20						0.019 ±0.049	2.230 ± 0.10		16.151 ± 3.14	8.556±2.076	2.978 ± 0.494	1.615 ± 0.308										18-68									4.325	1.031	35	2.963	0.383	20		3.828	0.145	35	2.963	0.383	20
		甲减							1.712 ± 26.36			3.359 ± 0.743		0.712 ±0.028
Soma Sherif Abd El Gawad 2012		甲亢	8+10	32+20					0.02 ± 0.03	3.1 ± 0.12							1.95 ± 0.49	1.36 ± 0.24		4.9 ± 1.45	3.09 ± 0.73		25.0 ± 1.1	27.0 ± 0.8	26-42	25-43	12.1 ± 2.9	8.49 ± 3.0						12.5	4.38	40	5.46	1.77	30
									1.45 ± 0.43								1.39 ± 0.23			3.45 ± 0.81		治疗后	26.2 ± 1.2				11.7 ± 3.1							3.1	0.7	40	1.61	0.59	30
									治疗前后
	mean	SD	Total	mean	SD	Total			mean	SD	Total	mean	SD	Total
Krassas et al. 2006	22.7	1.4	53	29.2	1.5	30	甲减	homa-ir	22.7	1.4	53	21.8	1.3	53																									性别与对照组
Krassas et al.2005
Y aturu et al. 2004
Ozlem Kaplan 2012	3.2	3.5	30	2.9	2.9	30	甲减
Iglesias et al. 2003	4.5	0.4	20	2.9	0.3	20	甲亢
Sibel Guldiken 2008	2.6	1.2	25	2.4	1.5	25	甲减
	2.6	1.4	30	2.4	1.5	25	亚临床甲减																															Iglesias et al. 2003	女	甲减	5.7	1.2	17	8.4	0.7	20
Goomez-Zamudio 2016	10.56	12.92	49	7.1	4.48	49	甲减																															Iglesias et al. 2003	男	甲减	6.2	1.2	3	8.4	0.7	20
Koyuncu 2013																																						Ozlem Kaplan 2012	女	甲减	17.2	7.7	30	18.2	9.9	30
Dimitriadis 2006																																						Zainab Samir Yahya Hammo et al 2019	男	甲减	3.828	0.145	35	2.963	0.383	20
	19.83	169.63	230	34.31	564.84	355	甲亢																															Aksoy DY 2013	女	亚临床甲减	5.455	1.3825	36	5.39	2.3	27
Aksoy DY 2013	1.76	1.11	36	2.13	1.17	27	亚临床甲减		1.8	1.2	34	2.2	1.6	34																								Dimitriadis 2006	女	甲减	3.3	0.4	11	2.8	0.2	10
																																						Krassas et al. 2006	女	甲减	7.6	4.1	47	5.1	3.5	30
																																						Krassas et al. 2006	男	甲减	6.4	3.7	6	5.1	3.5	30
																																						Krassas et al. 2006	男	甲减治疗前后	6.4	3.7	6	7.9	4.3	6
																																						Krassas et al. 2006	女	甲减治疗前后	7.6	4.1	47	6.7	4.3	47
																																						Krassas et al. 2005	男	甲亢治疗前后	12.3	7.7	9	7.8	4	9
																																						Krassas et al. 2005	女	甲亢治疗前后	10.2	5.9	27	6.3	4.4	27
																																						Iglesias et al. 2003	男	甲减治疗前后	6.2	1.2	3	10.4	0.4	3			Krassas et al. 2006
																																						Iglesias et al. 2003	女	甲减治疗前后	5.7	1.2	17	5.6	1.4	17
																																						Ozlem Kaplan 2012	女	甲减术后	17.2	7.7	30	18.2	9.9	30			Krassas et al. 2005
																																																	Iglesias et al. 2003
																																						Zainab Samir Yahya Hammo et al 2019	男	甲亢	4.325	1.031	35	2.963	0.383	20
																																						Krassas et al. 2005	男	甲亢	12.3	7.7	9	6.1	3.7	23
																																						Krassas et al. 2005	女	甲亢	10.2	5.9	27	6.1	3.7	23
r
auther	Year		r-p	FT3		r-p	FT4		r	TSH		r	T3		r	T4				r-p	FT3		r-p	FT4		r	TSH		r	T3		r	T4
Krassas	et al. 2006	wu																甲亢
															Yaturu	et al. 2004	5	69	甲亢	>0.05		69	<0.005	0.24		>0.05
Krassas	et al.2005	wu													Koyuncu	et al.2013			甲亢						15	0.08	0.466
															chen	et al. 2016		230	甲亢	<0.001	0.408	230	<0.01	0.903		<0.001	-0.081
Yaturu	et al. 2004	总	<0.01	0.3		<0.01	0.37		<0.05	-0.22					Zainab Samir Yahya Hammo	et al 2019			甲亢						35	0.922	-0.017	35	0.774	0.05	35	0.857	0.031
		甲亢	>0.05			<0.005	0.24		>0.05						Soma Sherif Abd El Gawad	et al.2012		40	甲亢	0.639	0.21	40	0.937	0.06	40	0.061	0.27
		甲减	<0.02	0.39		<0.05	0.36		>0.05
Ozlem Kaplan	et al. 2012	wu
															Yaturu	et al. 2004	4	32	甲减	<0.02	0.39	32	<0.05	0.36		>0.05
Iglesias	et al. 2003	wu													Koyuncu	et al.2013			甲减						15	0.226	0.332
															chen	et al. 2016		197	甲减	0.197	0.239		<0.01	-1.064		0.948	0.004
Sibel Guldiken	et al.2008	wu													Zainab Samir Yahya Hammo	et al 2019			甲减						35	<0.01	0.821	35	0.14	-0.254	35	0.436	-0.136
Gómez-Zamudio	et al.2016	wu							p
Koyuncu	et al.2013	总甲亢							0.01	0.463					Koyuncu	et al.2013	2		亚临床甲减						16	0.322	0.265
		总甲减							0.328	0.182					Akbaba	et al. 2015									51	0.53	0.105
		甲减							0.226	0.332
		甲亢							0.08	0.466
		亚临床甲减							0.322	0.265
		亚临床甲亢							0.904	0.034					chen	et al. 2016			正常	0.766	0.06		<0.01	1.32		0.813	-0.018
Dimitriadis	et al. 2006	无
															Yaturu	et al. 2004		101	总	<0.01	0.3	101	<0.01	0.37	101	<0.05	-0.22
chen	et al. 2016	正常	0.766	0.06		<0.01	1.32		0.813	-0.018
		甲减	0.197	0.239		<0.01	-1.064		0.948	0.004
		甲亢	<0.001	0.408		<0.01	0.903		<0.001	-0.081
Aksoy	et al. 2013	wu
Akbaba	et al. 2015	治疗前							0.53	0.105
	亚临床甲减	治疗后							0.182	0.221
Zainab Samir Yahya Hammo	et al 2019	甲减							<0.01	0.821		0.14	-0.254		0.436	-0.136
		甲亢							0.922	-0.017		0.774	0.05		0.857	0.031
Soma Sherif Abd El Gawad	et al.2012	甲亢	0.639	0.21		0.937	0.06		0.061	0.27
Authors	year	甲状腺功能障碍	doi	Title	Country	Study design	Follow-up	失访人数	Baseline, y	No. *总	人员简介	样本来源 Description of Study Sample	Criteria for inclusion	Criteria for exclusion	change	抵抗素Sample assay, storage	激素检测项目	激素检测	疾病病因	Medication Users 甲状腺药物使用	FT3、 FT4、 TT3、 TT4、 TSH、	TSH/FT4/TPOAb+等的参考指标	甲状腺功能障碍 定义	BMI及其他定义
Krassas et al. 2006	2006	hypothyroidism		Resistin levels are normal in hypothyroidism and remain unchanged after attainment of euthyroidism: Relationship with insulin levels and anthropometric parameters	Greece	prospective study	4 to 5 months		2006	83	53例甲状腺功能减退的桥本氏病患者（6例男性，47例女性）和30例对照组	Endocrine Department of Panagia Hospital, Thessaloniki, Greece				Serum concentration of resistin was measured using a commercial enzyme immunoassay kit (Phoenix pharmaceuticals Inc. Belmond CA）	serum total TT3,free T4,TSH and thyroid anti-microsomal and anti- thyroglobulin autoantibodies (AMA and ATA) measurements	Serum levels of TT3. FTs. TSH, AMA and ATA were measured by standard, commercial radioimmunoassay kits (Brahms, Hen-ningsdorf, Germany），Serum insulin levels were determined using an immunoradiometic assay kit (Biosource INS- IRMA kit, Biosoure Europe SA Nelles,Belgium).	Hashimoto's thyroiditis	levothyroxine treatment		TT3(1.08-3.08nmol/L,),FT4(9.0-25.7pmol/L),TSH(0.25-4.5mU/l),AMA(<60U/L),ATA(<60U/l)
Krassas et al.2005	2005	hyperthyroid		Resistin levels in hyperthyroid patients before and after restoration of thyroid function: relationship with body weight and body composition	Greece	prospective study	3– 4 months	43-36	2005	66	共调查了43例甲亢患者(男12例，女31例)，并与23例对照组进行比较。健康体检者23例(男10例，女13例)，对43名患者中的36名(9名男性，27名女性)	All patients were newly diagnosed and recruited from the Endocrine Department of Panagia Hospital, Thessaloniki.			Body weight (kg),BMI (kg/m2) ,Waist circ. (cm) ,Body fat (%)	The serum concentration of resistin was measured using a commercial enzyme immunoassay kit (Phoenix Pharmaceuticals Inc., Belmond, CA, USA).	serum total triiodothyronine (tT3), free thyroxine (fT4) and thyrotropin (TSH).	the serum concentrations of tT3, f T4, and TSH were measured by standard, commercial radioimmunoassay kits (Brahms, Henningsdorf, Germany).				Total T3 (nmol/l) ,(NR ¼ 1.08–3.08);Free T4 (pmol/l) ,(NR ¼ 9.0– 25.7),;TSH (mIU/l) ,(NR ¼ 0.25–4.5)
Y aturu et al. 2004	2004	hyperthyroidism; hypothyroidism		Changes in Adipocyte Hormones Leptin, Resistin, and Adiponectin in Thyroid Dysfunction	Shreveport, Louisiana	prospective study	未详细说明	69-32	2004	101	测量了之前患有 Graves 病的 69 名受试者和 32 名患者的脂联素、抵抗素和瘦素 在甲状腺功能亢进症治疗后的随访中。 在甲状腺功能亢进症治疗后的随访中。	The study subjects include 69 subjects with Graves’ disease seen at LSU Health sciences center and Overton brooks VA medical center for hyperthyroidism.				Serum resistin concentration was measured by using a sandwich enzyme-linked immunosor- bent assay (ELISA; Phoenix Pharmaceuticals, Inc.). serum was stored at -20 ℃ or -80℃	Thyroid Stimulating Hormone (TSH), Free Tetra Iodothyronin (FT4), and Free Triiodothyronine (FT3)	Thyroid function tests were measured by immunoassay.	Graves病患者放射性碘治疗	Patients with Graves’ disease were treated with radioactive iodine or antithyroid drugs and followed in the endocrinology clinic.		未说明	无
Ozlem Kaplan 2012	2012	hypothyroidism		unchanged serum adipokine concentrations in the setting of short-term thyroidectomy-induced hypothyroidism	Istanbul, Turkey	prospective study	术后3周	0	2012	30	Thirty-six euthyroid premenopausal female patients who were can- didates for thyroidectomy because of euthyroid nodular goiter were initially included in this study.	This study was designed in the Ministry of Health, Istanbul Training and Research Hospital, Departments of Internal Medicine and Surgery, Istanbul, Turkey.	hypothyroid state (postoperatively, with a thyroid-stimulating hormone concentration >30 mIU/L).Euthyroidism was defined as normal serum free thyroxine (FT4) (reference range, 0.93 to 1.7 ng/dL) and free triiodothyronine (FT3) (reference range, 2.0 to 4.4 pg/mL) concentrations in association with a thyroid-stimulating hormone (TSH) concentration >0.1 and <4.0 mIU/L. Another inclusion criterion wa…	excluded from the study if they had received any antithyroid medication or levothyroxine or corticosteroid therapy during the previous 3 months or if they had a chronic disease (for example, diabetes mellitus, liver disease, renal insufficiency, or obstructive apnea syndrome), received nutritional support (enteral or parenteral nutrition or both), had an acute infection, or were current smokers. …		Serum levels of resistin were measured by enzyme-linked immunoassay (EMD Millipore).	FT3、FT4、TSH，	Serum samples were separated and stored at −80°C ，Serum insulin, FT3, FT4, TSH, and thyroid autoantibodies were measured by an electrochemiluminescence method with use of a modular Elecsys 170 (Roche Diagnostics, Mannheim, Germany)	全甲状腺切除术	全甲状腺切除术			Euthyroidism was defined as normal serum free thyroxine (FT4) (reference range, 0.93 to 1.7 ng/dL) and free triiodothyronine (FT3) (reference range, 2.0 to 4.4 pg/mL) concentrations in association with a thyroid-stimulating hormone (TSH) concentration >0.1 and <4.0 mIU/L.	体重指数>18.5但≤为25 kg/m2的正常体重妇女(n=10)，体重指数>25但≤为30 kg/m2的超重妇女(n=7)，肥胖妇女>30 kg/m2(n=13)。
Iglesias et al. 2003	2003	hyperthyroidism and hypothyroidism		Serum concentrations of adipocytokines in patients with hyperthyroidism and hypothyroidism before and after control of thyroid function	Segovia，Madrid, Spain	prospective study	未详细说明	0	2003	60	甲亢组20例，女性16例，男性4例。甲亢的病因为Graves病17例，中毒性腺瘤2例，中毒性多结节甲状腺肿1例。一名患者患有糖尿病。甲状腺功能减退组20例，女性17例，男性3例，平均年龄51.5±4.1岁。甲减的病因为慢性自身免疫性甲状腺炎[桥本甲状腺炎7例，慢性萎缩性甲状腺炎5例]，既往131I治疗7例，碳酸锂治疗1例。对照组20例，女性17例，男性3例，年龄28~70岁	Department of Endocrinology , Hospital General, Segovia；Department of Endocrinology , Hospital Ramón y Cajal, Madrid, Spain；All subjects were ambulatory and were studied as outpatients during visits to the endocrinology clinic.			调整BMI	Serum resistin concentration was measured by using a sandwich enzyme-linked immunosorbent assay (ELISA; Phoenix Pharmaceuticals, Inc, Belmont, CA, USA).	free T4 (FT4), total T3, TSH	serum was stored at − 20 ° C until assayed. Serum TSH and FT4 were measured by an immunoenzymatic assay (MEIA, Abbot Diagnostics, Chicago, IL, USA).A commercially available electrochemiluminescence immunoassay (ECLIA, Boehringer Mannheim, Germany) was used to determine total T3 concentrations.	Graves病17例，中毒性腺瘤2例，中毒性多结节甲状腺肿1例	左旋甲状腺素，甲亢患者均用他巴唑(MMI)控制甲亢，所有甲亢患者均用他巴唑(MMI)控制甲亢。4例行131I治疗，1例行甲状腺次全切除术。在甲减患者中，调整左旋甲状腺素(LT4)的剂量
Sibel Guldiken 2008	2008	Overt Hypothyroidism and Subclinical Hypothyroidism	DOI: 10.1097/TEN.0b013e3181652c8d	Levels of High-Sensitivity C-Reactive Protein, Leptin, and Resistin in Patients With Overt Hypothyroidism and Subclinical Hypothyroidism	Edirne, Turkey	prospective study	未详细说明	0	2008	80	25例OH、30例SH和25例健康体检者	From the Divisions of *Endocrinology and Metabolism and †Haematology, Department of Internal Medicine, University of Trakya, Edirne, Turkey.		Exclusion criteria for all subjects included hyperprolactinemia, Cushing syndrome, diabetes mellitus, cardiac, renal, and other systemic diseases and current or previous use of drugs affecting hemostasis and thyroid function (oral contraceptives, glucocorticoids, antiandrogens, antidiabetic, and antiobesity drugs). All subjects were nonsmokers and nondrinkers. None of the participants had ever re…		using enzyme-linked immunosorbent assay method，Resistin (Biovendor, LLC), leptin (Biovendor, LLC), and hs-CRP (BioCheck, Inc.) were measured by enzyme-linked immunosorbent assay methods.	FT3、FT4、TSH，	measured by an immunometric assay method, chemiluminescent immunoassay method, and a competitive immunoassay method, respectively (DPC, Immulite 2000, CA).	甲状腺功能减退的病因为慢性自身免疫性甲状腺炎(n？32)、甲状腺次全切除术(n？15)、131I治疗(n？8)。	无		TSH (third generation, normal range0 . 4–4 μIU/mL), fT4 (normal range 0.8 –1.9 ng/dL), fT3(normal range 1.8 – 4.2 pg/mL) (normal range 1.8 – 4.2 pg/mL) 0 . 4–4 ?IU/mL), fT4 (normal range 0.8 –1.9 ng/dL), fT3 (normal range 1.8 – 4.2 pg/mL) levels	OH was defined by elevated serum thyroid-stimulating hormone (TSH) concentrations and decreased serum free T4 (fT4) concentrations. SH was defined as a serum TSH concentration above the upper limit of the reference associated with normal serum fT4 and fT3 concentrations.
Goomez-Zamudio 2016	2016	Hypothyroid		High Thyroid-stimulating Hormone Levels Increase Proinflammatory and Cardiovascular Markers in Patients with Extreme Obesity	México City, México	cross-sectional study	未详细说明	0	2016	98		We performed a cross-sectional study with 101 (21 males and 80 females) evaluated before bariatric surgery at the Obesity Clinic in the Hospital de Especialidades, Centro Medico Nacional Siglo XXI, IMSS in Mexico City.				m e a s u r e d b y e n z y m e - l i n k e d i m m u n o -sorbent assay (ELISA) using commercial kits for human sorbent assay (ELISA) using commercial kits for human Patients under pharmacological treatment (metformin, thiazolidinedione, angiotensin-converting enzyme inhibitors and angiotensin receptor blockers) suspended their treatment for 1 week before blood sample collection to avoid the con…	TSH、FT4	Serum TSH and FT4 levels were measured by electrochemoluminiscence (IMMULITE 1000, Siemens). 。Samples were centrifuged at 2500 ? g for 15 min and serum aliquots were obtained.	无	无		The normal values for TSH and free thyroxine (FT4) were from 0.27e4.2 mUI/mL and from 0.93e1.7 ng/dL, respectively.	Hypothyroidism was considered when TSH O4.2 mUI/mL with FT4 !0.93 ng/dL (overt hypo- thyroidism) or FT4 in normal range (subclinical hypothy- roidism)	体重指数(BMI)为40公斤/平方米，符合世界卫生组织的标准，定义为极端或III级肥胖
Koyuncu 2013	2013	全		Serum Resistin and Insulin-Like Growth Factor-1 Levels in Patients with Hypothyroidism and Hyperthyroidism	Isparta , Turkey;Bursa , Turkey	prospective study	未详细说明	0	2013	78	15例20~76岁的HT患者，16例26~71岁的SCHT患者，15例22~79岁的HRT患者，15例26~70岁的SCHrT患者，以及17例经体格检查和实验室检查证实为健康的对照组。志愿者总人数为78人。					采用酶联免疫吸附试验测定血清抵抗素水平，AdipoGen Human Resistin ELISA kit (AdipoGen Inc., Incheon, Korea) was used to determine resistin levels.	TSH、FT4	TSH ve fT4 levels were determined in Beckman Coulter UniCel DxI 800 autoanalyzer (Beckman Coulter Inc., CA, USA) by using access high sensitive TSH 3rd generation and access fT4 successively by chemiluminescence method.		无		TSH (휇IU/mL) 0.34–5.6，fT4 (ng/dL) 0.58–1.64	The individuals having TSH levels over 5.6 휇IU/mL and serum free T4 (fT4) levels below 0.58 ng/dL were classified as HT; the individuals having TSH levels over 5.6 휇IU/mL and serum fT4 levels 0.58–1.64 ng/dL were classified as SCHT. The individuals having TSH levels below 0.34 휇IU/mL and serum fT4 levels over 1.64 ng/dL were classified as HrT; the individuals having TSH levels below 0.34 휇IU/mL a…
Dimitriadis 2006	2006	Hypothyroid		Insulin Action in Adipose Tissue and Muscle in Hypothyroidism	Athens, Greece		0	0	2006	21	11名甲状腺功能减退者(HO，年龄45？3岁)和10名甲状腺功能正常的受试者(欧盟，年龄42？4岁)	2nd Department of Internal Medicine (G.D., P.M., V.L., E.B., S.A.R.), Research Institute and Diabetes Center, Athens University Medical School, “Attikon” University Hospital, GR-12462 Haidari, Greece; Hellenic National Diabetes Center (E.M., S.A.R.), GR-10675 Athens, Greece;					T3,T4,TSH
chen 2016	2016	hypothyroidism and hyperthyroidism		Changes in profile of lipids and adipokines in patients with newly diagnosed hypothyroidism and hyperthyroidism	Shenyang, Liaoning, P . R. China.	A cross-sectional study		0	2014	782	197例新诊断的甲减患者、230例新诊断的甲亢患者和355例正常对照进行了横断面研究。	于2014年7月至2014年12月在中国医科大学沈阳第一附属医院完成甲状腺功能正常患者427例(甲状腺功能低下197例，甲状腺功能亢进230例)和正常对照355例。	纳入标准为18岁至75岁，新诊断和未治疗的甲状腺功能障碍患者。	排除标准包括甲状腺疾病、糖尿病、高血压、中风、肝病和任何其他已知疾病的病史，最近两年内怀孕，以及任何可能改变甲状腺激素水平或脂代谢的药物。		采用双抗体夹心法测定血清脂联素、抵抗素和瘦素水平。	FT4、FT3、TSH	按标准方法分离血清。采用固相化学发光免疫分析法(IMMULITE1000，DPC，USA)测定血清FT3、FT4和TSH水平。					甲亢患者血清FT3和/或FT4水平升高，而TSH水平低于参考范围(FT4，9.01-19.05pmol/L；FT3，2.63-5.70pmol/L；TSH，0.35-4.94mIU/L)。甲减患者血清FT3和/或FT4水平降低，而血清TSH水平升高。
Aksoy DY 2013	2013	subclinical hypothyroidism	DOI: 10.12659/MSM.883847	Serum resistin and high sensitive CRP levels in patients with subclinical hypothyroidism before and after L-thyroxine therapy	Ankara, T urkey	prospective study	6个月	2		63	包括36名SH患者和27名年龄和体重指数匹配的健康对照妇女。					Resistin is measured with ELISA from frozen samples (Biovendor, Human Resistin Elisa, Biovendor Laboratorni Medicina, Czech Republic) (Sensitivity 0.033 ng/ml, test limit 50 ng/ml, intraassay variation 2.8–3.4%, inter- assay variation 5.1–6.9%).	TSH、FT4、FT3	Thyroid function tests are measured using electro chemiluminescent immunoassay (Roche Diagnostics Indianapolis, IN, USA). The functional sensitivity of the TSH assay was 0.014 µIU/ml (range 0.005–100 µIU/ml).		L-thyroxine therapy		Normal range of thyroid tests were TSH – 0.27–4.2 mIU/mL, and free T4 – 12–22 pmol/L). Patients with TSH levels between 4.2 to 10 mIU/mL with normal FT4 values are accepted to have SH.	亚临床甲状腺功能减退症(SH)的定义是促甲状腺激素(TSH)水平升高，游离甲状腺激素(FT4)和游离三碘甲状腺原氨酸(FT3)水平正常。
Akbaba 2015	2015	subclinical hypothyroid	DOI 10.1007/s00508-015-0865-9	Changes in the before and after thyroxine treatment levels of adipose tissue, leptin, and resistin in subclinical hypothyroid patients	Ankara, Turkey	prospectively	3个月			94	选择51例SH患者和43例年龄、性别匹配的健康受试者。	Fifty-one patients who presented at the Endocrinology Clinic of Ankara Numune Training and Research Hospital and received SH diagnosis were included in the study.				resistin levels: Venous blood samples were collected in vacutainer tubes and centrifuged at 1300 g for 10 min. Sera were separated and stored at − 20 °C until analysis. Human leptin and resistin levels were determined quantitatively by enzyme-linked immunosorbent assay (ELISA) with an ELISA microplate strip washer (ELX50; BioTek Instruments, USA) and ELISA microplate reader (Chromate; Awareness T…	TSH、FT4	Thyroid function tests: the Abbott Architect 2000 device and chemiluminescence micro-particle immunoassay approach were used to detect free triiodothyronine (fT3), freeT4 (fT4), and TSH concentrations.	The etiology of hypothyroidism was autoimmune thyroiditis in 90.1 % of the patients.	L-thyroxine of 25–50 µg/day was started, and the dose was adjusted by monthly TSH controls. Euthyroidism was provided with an average dose of 50–75 µg of L-thyroxine.			Patients with TSH levels between 4.0–10 mIU/mL with normal fT4 values are accepted to have SH当血清促甲状腺激素(TSH)浓度升高，而血清甲状腺激素浓度正常时，就会发生亚临床甲状腺功能减退(SH)。	稳态模型评估的胰岛素敏感性(HOMA)计算为“空腹血糖(mmol/l)×空腹血浆胰岛素]/22.5
Zainab Samir Yahya Hammo et al 2019	2019	hypothyroidism and hyperthyroidism	DOI : 10.35124/bca.2019.19.2.3653	THE ROLE OF ADIPOKINES : LEPTIN, RESISTIN AND CRP IN THYROID DYSFUNCTION	Tikrit, Iraq.	a cross sectional study			2018	90	The study included (70) men patients, 35 of them have hyperthyroidism and 35 have hypothyroidism, their ages between (18-68 years) old. As well as choosing random group included 20 sample of healthy men of ages between (18-68 years) old	This was a cross sectional study which was conductedin National Diabetes Center which follows to Al-Mustansiria University in Baghdad from July 2018 to September 2018.				用酶联免疫吸附试验(ELISA)试剂盒检测血清瘦素、抵抗素水平。	TSH、T4、T3	用ELFA法测定甲状腺激素(TSH、T4、T3)
Soma Sherif Abd El Gawad 2012	2012	hyperthyroid	10.4158/EP11130.OR	Plasma levels of resistin and ghrelin before and after treatment in patients with hyperthyroidism	Mansoura , Egypt.		3 to 4 months		2011	70	研究对象包括40例甲状腺功能亢进症患者(女性32例，男性8例，年龄26~42岁)和30例甲状腺功能正常的健康者(女性20例，男性10例，年龄25~43岁)作为对照组。	Adult hyperthyroid patients and healthy euthyroid patients (for controls) were recruited from the outpatient clinics of the Specialized Medical Hospital at Mansoura University in Cairo, Egypt.		Patients with clinical symptoms of thyroid eye disease (other than mild forms) or other comorbidities or who were receiving radioactive iodine or medication (antidiabetic drugs, angiotensin-converting enzyme inhibitors, antipsychotic agents, antiepileptic agents, appetite suppressants, or stimulant drugs) were excluded from the study.		The plasma concentration of resistin was measured using commercially available enzyme immunoassay kits (Phoenix Pharmaceuticals, Inc, Belmont, California) (17). The method of measurement was performed according to the manufacturer instructions.	FT3 and FT4 、 TSH	甲状腺激素(游离三碘甲腺原氨酸[FT3]、游离甲状腺素[FT4]和促甲状腺激素[TSH])采用电化学发光免疫分析法(Electrsys 2010；罗氏诊断，德国曼海姆)(15)。	甲状腺功能亢进36例为Graves病，4例为中毒性结节性甲状腺肿。	antithyroid drugs such as carbimazole		thyrotropin, 0.27-4.2 mIU/L; free thyroxine, 0.93-1.7 ng/dL; free triiodothyronine, 2.5-4.3 pg/mL; resistin, 1.8-8.6 ng/mL; ghrelin, 300-800 pg/mL; fasting blood glucose, 70-110 mg/dL; fasting insulin, 6-17 mIU/mL.
[truncated: 40 more columns]
